# Supplementary material
Source: PubMed Central journal article supplement (PMC2820176)
Supplement: mmc1.pdf [file mmc1.pdf]

## **Homozygosity Mapping Reveals Mutations of GRXCR1 as a Cause of Autosomal Recessive Nonsyndromic Hearing Impairment DFNB25**

Margit Schraders, Kwanghyuk Lee, Jaap Oostrik, Patrick L.M. Huygen, Ghazanfar Ali, Lies H. Hoefsloot, Joris A. Veltman, Frans P.M. Cremers, Sulman Basit, Muhammad Ansar, Cor W.R.J. Cremers, Henricus P.M. Kunst, Wasim Ahmad, Ronald J.C. Admiraal, Suzanne M. Leal, and Hannie Kremer

This document contains six elements:

Figure S1, which shows the pedigrees and genotypes of families with homozygous mutations in *GRXCR1*.

Figure S2, which shows the pedigree and haplotypes for family DEM 4265

Figure S3, which shows the pedigree and haplotypes for family DEM 4349

Figure S4, which shows an alignment of the GRXCR1 protein of different species.

Table S1, which gives primer sequences and PCR conditions

Table S2, which gives genotyping data of SNPs for families W98-053 and W07-0122

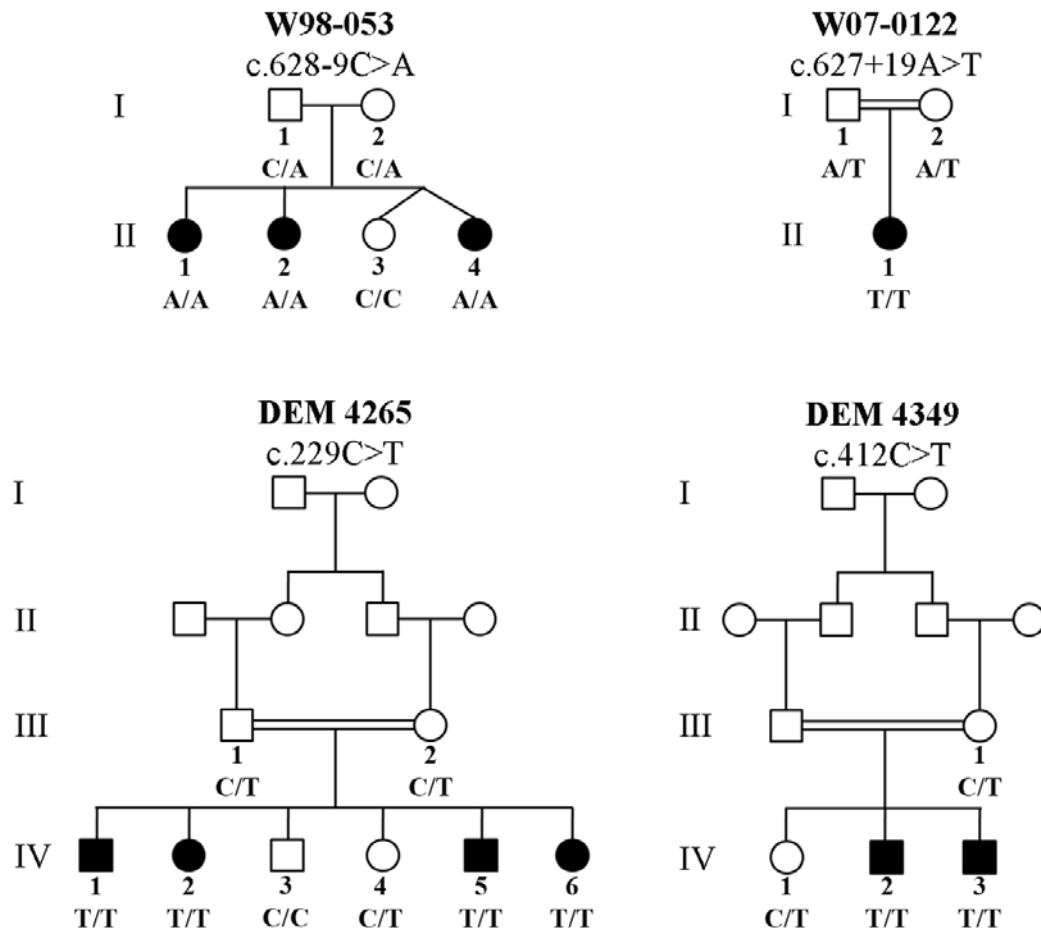

**Figure S1. Pedigrees and Genotypes of Families with Homozygous Mutations in *GRXC1***

The mutations co-segregate with the hearing impairment.



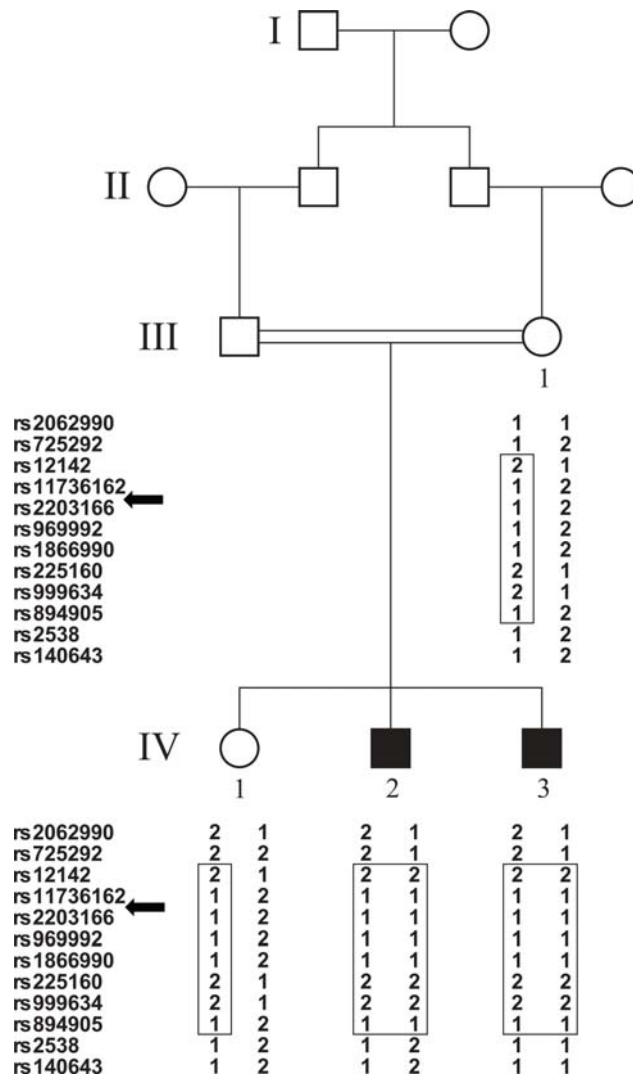

**Figure S3. Critical Region for Family DEM 4349**

Pedigree and haplotypes for SNP markers within and flanking the critical region are shown. The disease haplotype is boxed and the critical region is flanked by rs725292 and rs2538. The location of the *GRXCRI* gene is indicated with a black arrow.

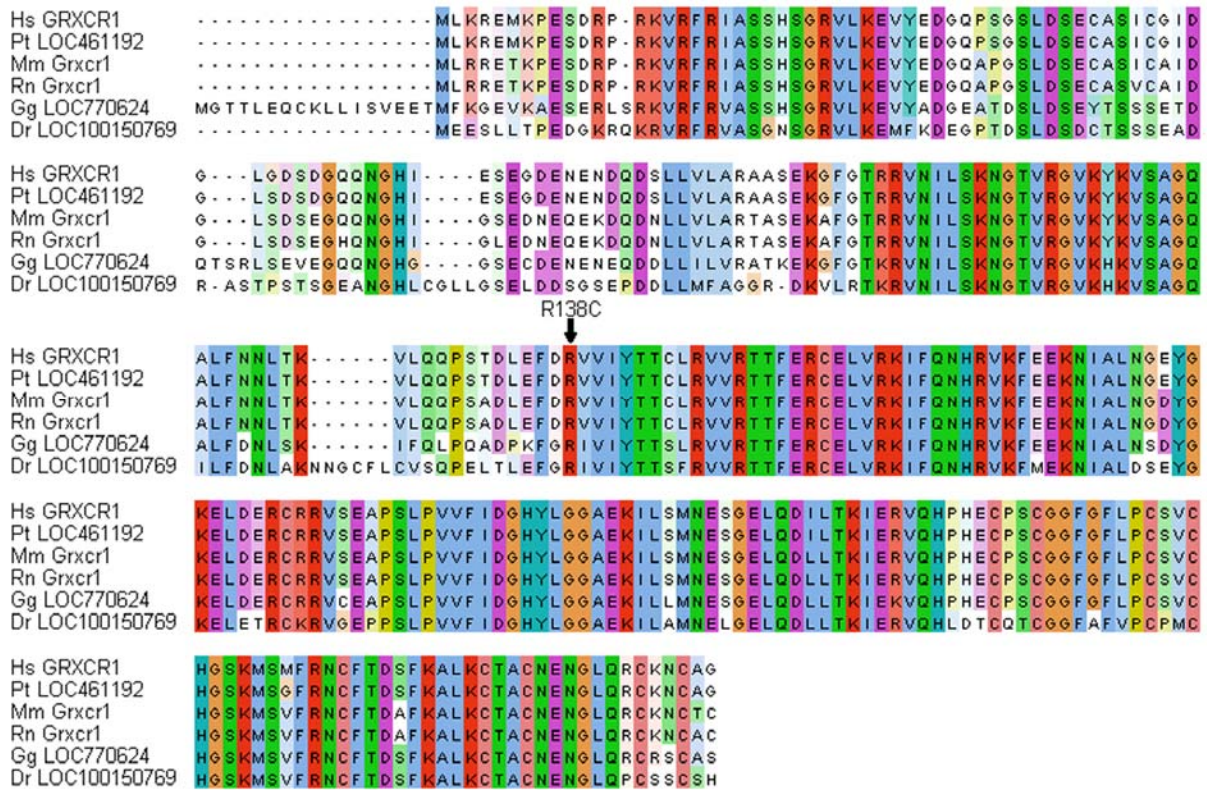

**Figure S4. Alignment of the GRXCR1 Protein of Different Species**

An alignment of GRXCR1 orthologs was made using ClustalW and Jalview. (Waterhouse et al. *Bioinformatics* 25(9): 1189-1191 (2009) and Larkin et al. *Bioinformatics* 23(21):2947-2948 (2007). Hs, Homo sapiens; Pt, Pan troglodytes; Mm, Mus musculus; Rn, Rattus norvegicus; Gg, Gallus gallus; Dr, Danio rerio. Accession numbers of the various protein sequences: Hs GRXCR1: NP\_001073945.1, Pt LOC461192: XP\_517170.2, Mm Grxcr1: NP\_001018019.1, Rn Grxcr1: XP\_573590.2, Gg LOC770624: XP\_001233963.1, Dr LOC100150769: XP\_001919567.1. The colors of the amino acids show the degree of conservation.

**Table S1. Sequences of Primers for Amplifications of Exons, Intron-Exon Boundaries and Transcripts of *GRXCRI***

| Fragment                                       | Oligonucleotides                                                       | Size (bp) | Annealing Temperature (°C) |
|------------------------------------------------|------------------------------------------------------------------------|-----------|----------------------------|
| Primers for PCR and sequence analysis          |                                                                        |           |                            |
| <i>GRXCRI</i> exon 1                           | Forward: gccatcactagaattggctc<br>Reverse: tgcaataagagaggcttgc          | 584       | 58                         |
| <i>GRXCRI</i> exon 2                           | Forward: attcaattttattgcatggc<br>Reverse: aaaaccagcaagtgttccag         | 490       | 56                         |
| <i>GRXCRI</i> exon 3                           | Forward: caaagggagaactgtgctc<br>Reverse: tgccacatgtatcctattgc          | 308       | 56                         |
| <i>GRXCRI</i> exon 4                           | Forward: tgaccactcacagttcagaaag<br>Reverse: gaaaccagggtctagcacag       | 498       | 56                         |
| <i>ATP8A1</i> exon 1                           | Forward: tgcctttctcctcctctgctc<br>Reverse: aggtaggatgagggtctcttc       | 330       | 58                         |
| primers for ARMS PCR                           |                                                                        |           |                            |
| wildtype exon 2                                | Forward: attaccttggggtaagtaagctgccagta                                 | 154       | 57                         |
| c.627+19A>T                                    | Forward: attaccttggggtaagtaagctgccagtt<br>Reverse: aagtgctccaatcccttgg | 154       | 57                         |
| Primers for analysis <i>GRXCRI</i> transcripts |                                                                        |           |                            |
| <i>GRXCRI</i> exon 2-3                         | Forward: aaacatagccctgaatggg<br>Reverse: gagggacactcatgtggatg          | 204       | 58                         |
| seminested                                     | Reverse: ggtaggatgtcttgcagttctcc                                       | 166       | 58                         |
| Primers for Q-PCR                              |                                                                        |           |                            |
| <i>GRXCRI</i> exon 2-3                         | Forward: ctccctccctgttgtgttc<br>Reverse: ggatgtcttgagttctctg           | 93        | 60                         |
| <i>GUSB</i>                                    | Forward: agagtggctgctgaggattgg<br>Reverse: ccctcatgctctagcgtgc         | 80        | 60                         |

**Table S2. Genotypes of Families W98-053 and W07-0122 for Markers within the DFNB25 Locus**

| SNP_ID        | rs_ID      | Genomic position on chr. 4 | W98-053 |      |      | W07-0122 |
|---------------|------------|----------------------------|---------|------|------|----------|
|               |            |                            | II.4    | II.2 | II.1 | II.1     |
| SNP A-2110311 | rs2612510  | 42432622                   | BB      | BB   | BB   | AA       |
| SNP A-2073163 | rs1380749  | 42433229                   | AA      | AA   | AA   | BB       |
| SNP A-2082601 | rs2612516  | 42435421                   | BB      | BB   | BB   | AA       |
| SNP A-1976944 | rs10517048 | 42443021                   | BB      | BB   | BB   | AA       |
| SNP A-1916015 | rs16854904 | 42443048                   | AA      | AA   | AA   | BB       |
| SNP A-1976945 | rs2345475  | 42443300                   | AA      | AA   | AA   | BB       |
| SNP A-1976946 | rs10517049 | 42443415                   | BB      | BB   | BB   | AA       |
| SNP A-1976947 | rs10517050 | 42443702                   | BB      | BB   | BB   | AA       |
| SNP A-4196984 | rs12640399 | 42490920                   | AA      | AA   | AA   | AA       |
| SNP A-1821662 | rs2575515  | 42495213                   | BB      | BB   | BB   | AA       |
| SNP A-2269519 | rs2575516  | 42495646                   | AA      | AA   | AA   | AA       |
| SNP A-1919620 | rs1450912  | 42504394                   | AA      | AA   | AA   | BB       |
| SNP A-1803110 | rs4861224  | 42510046                   | AA      | AA   | AA   | BB       |
| SNP A-1976949 | rs2218827  | 42515001                   | BB      | BB   | BB   | BB       |
| SNP A-4239046 | rs4036048  | 42525873                   | AA      | AA   | AA   | AA       |
| SNP A-4203389 | rs12508994 | 42526579                   | BB      | BB   | BB   | BB       |
| SNP A-1893657 | rs1450926  | 42535340                   | BB      | BB   | BB   | BB       |
| SNP A-2046909 | rs16855009 | 42535400                   | AA      | AA   | AA   | AA       |
| SNP A-2033735 | rs12642552 | 42542658                   | AA      | AA   | AA   | BB       |
| SNP A-1958182 | rs13142169 | 42548809                   | AA      | AA   | AA   | AA       |
| SNP A-1839559 | rs10938223 | 42549707                   | AA      | AA   | AA   | AA       |
| SNP A-2276302 | rs13142149 | 42562218                   | AA      | AA   | AA   | BB       |
| SNP A-2240952 | rs41493449 | 42590472                   | BB      | BB   | BB   | BB       |
| SNP A-1976955 | rs1450911  | 42609322                   | AA      | AA   | AA   | BB       |
| SNP A-2104688 | rs4861237  | 42609397                   | AA      | AA   | AA   | BB       |
| SNP A-2282630 | rs1376313  | 42616757                   | BB      | BB   | BB   | AA       |
| SNP A-4192751 | rs1450916  | 42620388                   | BB      | BB   | BB   | AA       |
| SNP A-1976956 | rs17534598 | 42620779                   | BB      | BB   | BB   | AA       |
| SNP A-1976957 | rs10517062 | 42628253                   | AA      | AA   | AA   | AA       |
| SNP A-1877660 | rs1450934  | 42634215                   | BB      | BB   | BB   | AA       |
| SNP A-4240696 | rs2345759  | 42634449                   | BB      | BB   | BB   | AA       |
| SNP A-2133212 | rs1597565  | 42634794                   | AA      | AA   | AA   | AA       |
| SNP A-4207671 | rs17450262 | 42641640                   | BB      | BB   | BB   | AA       |
| SNP A-1954996 | rs13105520 | 42652288                   | AA      | AA   | AA   | AA       |
| SNP A-2009753 | rs4346680  | 42653743                   | BB      | BB   | BB   | BB       |
| SNP A-2140147 | rs992133   | 42655425                   | BB      | BB   | BB   | AA       |
| SNP A-2102398 | rs1595188  | 42656122                   | BB      | BB   | BB   | AB       |
| SNP A-2076559 | rs7664576  | 42676268                   | BB      | BB   | BB   | AA       |
| SNP A-1909795 | rs9994547  | 42691897                   |         | AA   | AA   | AA       |
| SNP A-4226359 | rs1561147  | 42693025                   |         | BB   | BB   | BB       |
| SNP A-4239243 | rs16855182 | 42696452                   | BB      | BB   | BB   | BB       |
| SNP A-2137904 | rs10805107 | 42709288                   | AB      | AB   | AB   | BB       |
| SNP A-1875106 | rs16855222 | 42714046                   | BB      | BB   | BB   | BB       |
| SNP A-2255620 | rs10008544 | 42717608                   | BB      | BB   | BB   | BB       |
| SNP A-2273039 | rs10017415 | 42719903                   | BB      | BB   | BB   | BB       |
| SNP A-2084004 | rs10938230 | 42720012                   | AA      | AA   | AA   | BB       |
| SNP A-1976958 | rs10517066 | 42734363                   | BB      | BB   | BB   | BB       |
| SNP A-1976959 | rs16855262 | 42734802                   | AA      | AA   | AA   | AA       |
| SNP A-4228792 | rs11736676 | 42735775                   | BB      | BB   | BB   | BB       |
| SNP A-1976960 | rs10517069 | 42735820                   | BB      | BB   | BB   | BB       |
| SNP A-1976962 | rs920153   | 42737163                   | BB      | BB   | BB   | AA       |
| SNP A-4198005 | rs4512035  | 42737733                   | BB      | BB   | BB   | BB       |
| SNP A-2235122 | rs9291227  | 42738007                   | BB      | BB   | BB   | BB       |
| SNP A-2073972 | rs10938235 | 42744002                   | AA      | AA   | AA   | BB       |
| SNP A-1976963 | rs720961   | 42749414                   | AA      | AA   | AA   | BB       |
| SNP A-2128185 | rs2043640  | 42751838                   | AA      | AA   | AA   | AA       |
| SNP A-2074955 | rs6844568  | 42762326                   | AA      | AA   | AA   | AA       |
| SNP A-4237356 | rs6447209  | 42762467                   | AA      | AA   | AA   | AA       |
| SNP A-1976964 | rs1436472  | 42783059                   | BB      | BB   | BB   | AA       |
| SNP A-2183044 | rs10031221 | 42799900                   | AA      | AA   | AA   | AA       |
| SNP A-2072621 | rs7663681  | 42804500                   | AA      | AA   | AA   | BB       |
| SNP A-2307022 | rs6447228  | 42804528                   | BB      | BB   | BB   | AA       |
| SNP A-1837172 | rs1017429  | 42808275                   | AA      | AA   | AA   | AA       |
| SNP A-2076542 | rs1436485  | 42819467                   | AA      | AA   | AA   |          |
| SNP A-4196631 | rs1436487  | 42819777                   | BB      | BB   | BB   | AB       |
| SNP A-4198461 | rs6447236  | 42820381                   | BB      | BB   | BB   | AA       |
| SNP A-1901356 | rs4361423  | 42858360                   | AA      | AA   | AA   | AA       |
| SNP A-2155340 | rs4309873  | 42905245                   | AA      | AA   | AA   | AA       |

GRXCR1

In this table SNP genotypes of part of the overlapping homozygous regions are listed encompassing *GRXCRI*. The heterozygous calls for the SNPs in *GRXCRI* and telomeric to the gene have confidence level just above the threshold.
